# Supplementary material
Source: PubMed Central journal article supplement (PMC4809195)
Supplement: NIHMS735484-supplement-2.pdf [file NIHMS735484-supplement-2.pdf]

Table S1, Chinese sentence materials

*Chinese 4-syllable sentences*

|      |      |      |      |      |
|------|------|------|------|------|
| 老牛耕地 | 朋友请客 | 厨师做饭 | 电脑开机 | 游客爬山 |
| 树木生长 | 汽车拐弯 | 外公看报 | 轮船起航 | 渔民划船 |
| 冰雪融化 | 灯泡发光 | 婴孩啼哭 | 士兵战斗 | 军队撤退 |
| 小孩哭泣 | 农民种菜 | 鸭子游泳 | 蝴蝶飞舞 | 剪刀生锈 |
| 猎豹奔跑 | 青草发芽 | 和尚念经 | 蜘蛛结网 | 祖父下棋 |
| 老师讲课 | 太阳落山 | 鲸鱼喷水 | 公司开张 | 医生看病 |
| 绵羊吃草 | 开水沸腾 | 小偷逃走 | 兄弟吵架 | 护士打针 |
| 学生写字 | 导游讲解 | 熊猫睡觉 | 骏马奔驰 | 乌龟爬行 |
| 观众鼓掌 | 叛徒告密 | 英雄救火 | 母鸡下蛋 | 行人过街 |
| 演员跳舞 | 苹果成熟 | 狮子打架 | 飞机降落 | 法官判案 |

*Chinese 4-syllable verb phrases comprised of 1-syllable verb followed by a 3-syllable noun phrase.*

|      |      |      |      |      |
|------|------|------|------|------|
| 蒸灌汤包 | 熬银耳羹 | 戴老花镜 | 拍婚纱照 | 炒西红柿 |
| 买笔记本 | 敲架子鼓 | 念金刚经 | 过独木桥 | 擦防晒霜 |
| 摊鸡蛋饼 | 吃哈密瓜 | 演古装剧 | 拉大提琴 | 喝矿泉水 |
| 坐头等舱 | 吹单簧管 | 上历史课 | 打保龄球 | 切土豆丝 |
| 品乌龙茶 | 当志愿者 | 骑小毛驴 | 练太极拳 | 跑马拉松 |
| 修自行车 | 说普通话 | 养波斯猫 | 登长白山 | 嚼口香糖 |
| 捉萤火虫 | 听收音机 | 读红楼梦 | 考公务员 | 饮庆功酒 |
| 煮茶叶蛋 | 剥香蕉皮 | 泡方便面 | 种仙人掌 | 唱黄梅戏 |
| 开杂货店 | 讲闽南语 | 卖羽绒服 | 办身份证 | 榨花生油 |
| 付水电费 | 写毛笔字 | 换电灯泡 | 穿中山装 | 煎三文鱼 |

*Chinese 4-syllable verb phrases comprised of 2-syllable verb followed by a 2-syllable noun.*

|      |      |      |      |      |
|------|------|------|------|------|
| 举行比赛 | 制作节目 | 承担责任 | 浏览网页 | 缝合伤口 |
| 享受生活 | 发表言论 | 抓住机会 | 演唱歌曲 | 美化环境 |
| 伪造证据 | 召开会议 | 拜访亲友 | 点燃蜡烛 | 背诵散文 |
| 修理电脑 | 复习功课 | 拼写单词 | 看望老师 | 裁剪衣服 |
| 做出决定 | 寻求支持 | 捕捉昆虫 | 砍伐森林 | 装修房间 |
| 关闭大门 | 展示成果 | 播放广告 | 破坏气氛 | 解决问题 |
| 准备午饭 | 弹奏钢琴 | 支援灾区 | 等待时机 | 订阅期刊 |
| 饲养金鱼 | 总结教训 | 收集资料 | 粉刷墙壁 | 训练军队 |
| 种植青菜 | 打印文件 | 改正错误 | 绘制地图 | 购买设备 |
| 判断形势 | 批改试卷 | 整顿秩序 | 维护尊严 | 阅读书籍 |

### Chinese 4-syllable idioms

|      |      |      |      |      |
|------|------|------|------|------|
| 杞人忧天 | 毛遂自荐 | 塞翁失马 | 星火燎原 | 蜻蜓点水 |
| 骄兵必败 | 百花齐放 | 本性难移 | 鸚鵡学舌 | 老骥伏枥 |
| 危言耸听 | 飞黄腾达 | 飞蛾扑火 | 余音绕梁 | 金蝉脱壳 |
| 肝肠寸断 | 愚公移山 | 滥竽充数 | 玉树临风 | 金鸡独立 |
| 精卫填海 | 八仙过海 | 蓬荜生辉 | 众星捧月 | 盛气凌人 |
| 天花乱坠 | 白驹过隙 | 孟母三迁 | 怒发冲冠 | 万象更新 |
| 本末倒置 | 死灰复燃 | 庖丁解牛 | 孤掌难鸣 | 韦编三绝 |
| 山雨欲来 | 螳臂当车 | 破镜重圆 | 光阴荏苒 | 心血来潮 |
| 声名鹊起 | 醍醐灌顶 | 七窍生烟 | 归心似箭 | 新陈代谢 |
| 茅塞顿开 | 短兵相接 | 烽火连天 | 花枝招展 | 盲人摸象 |

### Chinese sentences varying in length and syntactic structure

|          |         |        |       |      |
|----------|---------|--------|-------|------|
| 理论要与实际结合 | 曼哈顿是一个岛 | 白云在天上飘 | 暴风雪来临 | 地动山摇 |
| 外面的世界很精彩 | 没有钱是不行的 | 鲜花逐渐凋零 | 贵人多忘事 | 打乒乓球 |
| 现在是二零一四年 | 将来生活会更好 | 红苹果最好吃 | 要抓住机会 | 准备出发 |
| 火车站今天不售票 | 驾驶一辆公交车 | 细雨下个不停 | 收到一封信 | 青草发芽 |
| 上海房价持续增长 | 门外有辆出租车 | 微风吹过水面 | 手术很成功 | 我要吃饭 |
| 浪费资源是可耻的 | 我喜欢上化学课 | 钱不是万能的 | 民以食为天 | 雨还在下 |
| 汽车在公路上行驶 | 孙悟空变化多端 | 阳光照进屋里 | 作业没写完 | 铁证如山 |
| 开会之前做好准备 | 谣言是不可信的 | 历史不会重演 | 西湖在杭州 | 创造奇迹 |
| 目前形势变得紧张 | 几个小孩在玩耍 | 我喜欢开玩笑 | 日久见人心 | 万马奔腾 |
| 中国人口比美国多 | 敌人隐藏在树后 | 公园建在山上 | 你不要害怕 | 祝你好运 |
| 这是一个民间传说 | 海边有很多贝壳 | 中国人口很多 | 为自由而战 | 乌云密布 |
| 研究中国传统文化 | 表哥在大学读书 | 他在澳大利亚 | 饭前请洗手 | 多加小心 |
| 黑龙江在中国东北 | 游乐场非常好玩 | 昨天已经过去 | 向前辈致敬 | 雄鹰展翅 |
| 对面是一座博物馆 | 社会问题很严重 | 天安门在北京 | 海上升明月 | 勤奋工作 |
| 为中华崛起而读书 | 冬天要注意保暖 | 温度慢慢降低 | 购买电视机 | 风沙很大 |
| 埃及有很多金字塔 | 一颗苹果掉下来 | 虚心使人进步 | 唱一支山歌 | 公鸡打鸣 |
| 这件事情务必办好 | 乡间小路不好走 | 这是关键问题 | 小孩学游泳 | 军队撤退 |
| 大雪造成航班取消 | 作业要按时完成 | 假期已经结束 | 江水向东流 | 明天放假 |
| 下周末我们去度假 | 好心必定有好报 | 这本书看不懂 | 保护大熊猫 | 树立榜样 |
| 一个人旅行要小心 | 使用笔记本电脑 | 天机不可泄露 | 阿姨去上班 | 复印文件 |
| 他在写一封推荐信 | 森林里生机盎然 | 飞机将要起飞 | 周末要加班 | 春光明媚 |
| 华盛顿是美国首都 | 河马是非洲动物 | 树林里有小鸟 | 哈密瓜很甜 | 开卷有益 |
| 始祖鸟是鸟类祖先 | 我要做有用的人 | 王老师教数学 | 乌鸦是黑的 | 高楼林立 |

|          |         |        |       |      |
|----------|---------|--------|-------|------|
| 海鸥在暴雨中翱翔 | 天下乌鸦一般黑 | 金钱豹跑得快 | 外公下象棋 | 刻舟求剑 |
| 士兵以服从为天职 | 小朋友们多高兴 | 时间过得真快 | 公交车到站 | 繁星满天 |
| 早上起来先要洗脸 | 那个同学真聪明 | 鲨鱼非常凶猛 | 天上飘雪花 | 鸡飞狗跳 |
| 加拿大比美国寒冷 | 这条围巾真漂亮 | 山上有座凉亭 | 白兔吃青草 | 美化环境 |
| 骆驼生活在沙漠里 | 上课要认真听讲 | 今天事情太多 | 大熊猫睡觉 | 苦尽甜来 |
| 餐馆里的灯光暗淡 | 人逢喜事精神爽 | 每天都要刷牙 | 酒后吐真言 | 熟能生巧 |
| 请大家系好安全带 | 勿以善小而不为 | 吃完饭就出发 | 我在打电话 | 天气真好 |
| 红烧牛肉面真好吃 | 偷鸡不成蚀把米 | 勇攀科学高峰 | 学习古汉语 | 不要紧张 |
| 探索大自然的奥秘 | 考试之前要放松 | 认真学习功课 | 周六不上课 | 河水结冰 |
| 猫头鹰在夜间活动 | 早饭一定要吃饱 | 最近心情很好 | 出门向前走 | 浏览网页 |
| 好习惯要从小养成 | 公园里有大草坪 | 从此不再迷茫 | 小松鼠逃跑 | 种植蔬菜 |
| 早睡早起是好习惯 | 邮递员送来包裹 | 要从小事做起 | 修理自行车 | 把他赶走 |
| 共同创造美好生活 | 年轻人要有理想 | 以天下为己任 | 礼轻情意重 | 轮船启航 |
| 动物园里有长颈鹿 | 图书馆开门很早 | 喝茶有益健康 | 请帮我开门 | 他在跑步 |
| 两支军队一起出发 | 不到长城非好汉 | 阅读古典名著 | 自扫门前雪 | 马上集合 |
| 教室里面不能喧哗 | 彩虹总在风雨后 | 烹调可口蔬菜 | 她还在吃饭 | 播放音乐 |
| 太阳系有九大行星 | 树上的松鼠真多 | 维护法律尊严 | 快刀斩乱麻 | 百花齐放 |

*Chinese sentences varying in the duration of the noun phrase (3-syllable noun phrase)*

|          |          |          |         |
|----------|----------|----------|---------|
| 玻璃杯要轻拿轻放 | 三个人一起去吃饭 | 两匹马飞快的奔跑 | 那顿饭吃得不错 |
| 我们俩明天去旅游 | 那些人非常有经验 | 老校长将要退休  | 博物馆周日关门 |
| 旧报纸不容易找到 | 运动会推迟一礼拜 | 小组长办事认真  | 登山包能够防雨 |
| 公务员为人民服务 | 天王星离地球很远 | 小松鼠跳来跳去  | 市政府下达指示 |
| 旅游团马上就出发 | 俄罗斯比中国寒冷 | 这首歌格外好听  | 金项链不翼而飞 |
| 董事长在布置任务 | 天安门坐落在北京 | 四季豆还没做好  | 施工队停止工作 |
| 父母亲最近都很好 | 西红柿富含维生素 | 张先生拒绝签字  | 发动机出现故障 |
| 大熊猫喜欢吃竹子 | 洛杉矶位于西海岸 | 电影票已经卖完  | 猫头鹰张开翅膀 |
| 辅导员今天要出差 | 外祖父对我非常好 | 敞篷车特别凉快  | 花围巾十分漂亮 |
| 长颈鹿是非洲动物 | 战士们为自由而战 | 旧电池需要回收  |         |
| 王老师很关心学生 | 加拿大盛产三文鱼 | 班主任大发雷霆  |         |
| 毒蘑菇长得很鲜艳 | 科学家提出新理论 | 足球赛仍未结束  |         |

*Chinese sentences varying in the duration of the noun phrase (4-syllable noun phrase)*

|          |          |          |         |
|----------|----------|----------|---------|
| 羽毛球拍挂在墙上 | 一切问题迎刃而解 | 股票价格大幅振荡 | 几只猫咪刚出生 |
| 大暴风雪即将来临 | 这个小孩很有前途 | 今年冬天格外冷  | 蓝色外套蛮好看 |

|          |          |         |         |
|----------|----------|---------|---------|
| 红烧牛肉非常好吃 | 新款服装降价促销 | 一片树叶飘下来 | 两只蜜蜂采花蜜 |
| 联欢晚会正式开始 | 电视节目枯燥无味 | 鲜榨果汁有营养 | 黑玫瑰花不常见 |
| 厚羽绒服可以御寒 | 个别同学没来上课 | 茉莉花茶真好喝 | 副总经理来参观 |
| 贵重物品随身携带 | 很多难题未能解决 | 夫妻两人都不在 | 大量警察在巡逻 |
| 新鲜牛奶有益健康 | 热血青年奋起抗争 | 那头黄牛在耕地 | 重要文件被偷走 |
| 公司财政十分紧张 | 鹅毛大雪下个不停 | 一只气球飞上天 | 考试题目挺简单 |
| 五星红旗迎风飘扬 | 期末考试因故取消 | 他的想法最特别 | 有些动物会游泳 |
| 强冷空气来自北方 | 满天星抖闪闪发光 | 淡水资源要珍惜 |         |
| 美元汇率继续上杨 | 河边柳树发出嫩芽 | 古代汉语很难懂 |         |
| 女服务员工作勤奋 | 总设计师绘制蓝图 | 白葡萄酒有点甜 |         |

*English 4-syllable sentences comprised of a 2-syllable noun phrase followed by a 2-syllable verb phrase.*

|                        |                        |                           |
|------------------------|------------------------|---------------------------|
| fat rat sensed fear    | kind words warm hearts | young child closed doors  |
| wood shelf holds cans  | long fight caused hate | thin threads hang plates  |
| tan girls drove trucks | dead sharks leak blood | their store sold cars     |
| gold lamps shine light | smart dogs dig holes   | cute cubs drink milk      |
| dry fur rubs skin      | slim kids like jeans   | six farms lost cows       |
| sly fox stole eggs     | sick boys fail tests   | sharp knife cuts cheese   |
| top chefs cook steak   | rear doors hide cups   | round soap killed germs   |
| our boss wrote notes   | pale hands make bread  | loud sound scared mom     |
| two teams plant trees  | bad smells fill town   | weird clowns wear hats    |
| all moms love kids     | mad foes smack chefs   | her sons paint walls      |
| new plans give hope    | quiet lamb ate grass   | giant bears cross streets |
| large ants built nests | soft fork brings food  | drunk dudes sang hums     |
| teen apes hunt bugs    | green frogs miss flies | little chick caught worms |
| rude cats claw dogs    | black skies show stars | brown bags take space     |
| rich cooks brewed tea  | tall guys flee camp    | four maids cleaned rooms  |
| fun games waste time   | gray goat climb hills  | big rocks block roads     |
| pink toys hurt girls   | iced beer costs cents  | fierce flood ruined farms |
| huge waves hit ships   | old kings gave speech  | warm ground melts snow    |
| deaf ears hear you     | blue eyes shed tears   | keen blades slash tires   |
| his aunt tied shoes    | white cars need gas    | poor friends paid bills   |

*English predictable Markovian sentences*

|          |          |         |
|----------|----------|---------|
| a girl   | found    | the key |
| the cake | tastes   | great   |
| coffee   | keeps me | awake   |
| dad      | ordered  | salad   |
| mom      | cooks    | dinner  |

|          |          |          |
|----------|----------|----------|
| they     | grow     | apples   |
| fish     | lives in | water    |
| earning  | money    | is hard  |
| homework | needs to | be done  |
| progress | has been | made     |
| my cat   | is so    | lovely   |
| New York | never    | sleeps   |
| I will   | buy a    | book     |
| he will  | take the | train    |
| parents  | became   | worried  |
| rumors   | are not  | true     |
| boys     | play     | football |
| dogs     | can be   | smart    |
| Nancy    | works    | at home  |
| Keith    | went to  | college  |
| Matt     | married  | carol    |
| Amy      | owns a   | farm     |
| Sarah    | looks    | happy    |
| Emma     | hates    | Alice    |
| Lauren   | came     | early    |

*The grammar for AMS set. The 3 candidate syllables for each component are listed.*

|    | AMS Set 1 | AMS Set 2 | AMS Set 3 | AMS Set 4 | AMS Set 5 |
|----|-----------|-----------|-----------|-----------|-----------|
| C1 | qiū       | hā        | chóu      | guī       | liú       |
|    | dá        | shuài     | juàn      | lǐ        | cā        |
|    | huà       | nóng      | biǎo      | kòu       | tián      |
| C2 | zhāng     | lǚ        | zāi       | tāo       | xiào      |
|    | rě        | péi       | xián      | qí        | lǚ        |
|    | yuè       | dīng      | huì       | jūn       | niè       |
| C3 | miǎn      | rì        | wēn       | xíng      | fǒu       |
|    | jú        | mǎng      | qiǎng     | zǔ        | gé        |
|    | duì       | zhuī      | luè       | mǒu       | zhuàng    |

Table S2. Behavioral performance for all experimental conditions (mean  $\pm$  SEM). The miss rate and the false alarm rate are averaged to create an average error rate.

|       |                      |                   |                  |                    |            |
|-------|----------------------|-------------------|------------------|--------------------|------------|
| Exp 1 | 4-syllable sentences | 4-syllable idioms | random syllables | backward syllables |            |
|       | 18.8 ± 13.8%         | 9.4 ± 9.8%        | 14.4 ± 12.7%     | 20.6 ± 24.7%       |            |
| Exp 2 | 4-syllable           | 4-syllable        | 4-syllable       | 2-syllable         | 2-syllable |

|       | sentences                                                 | VP (type I)        | VP (type II)                      | NP                              | VP        |
|-------|-----------------------------------------------------------|--------------------|-----------------------------------|---------------------------------|-----------|
|       | 12.8 ± 3.5%                                               | 4.1 ± 2.0%         | 20.0 ± 3.0%                       | 22.5 ± 5.6%                     | 20 ± 6.0% |
| Exp 3 | Sentences with variable duration and syntactic structures |                    |                                   |                                 |           |
|       | 9.4 ± 2.5%                                                |                    |                                   |                                 |           |
| Exp 4 | Sentences with variable NP durations                      |                    |                                   |                                 |           |
|       | 23.5 ± 4.7%                                               |                    |                                   |                                 |           |
| Exp 5 | 4-syllable sentences                                      | 4-syllable idioms  | random syllables                  | backward syllables              |           |
|       | 36.3 ± 6.4%                                               | 46.3 ± 6.1%        | 40.0 ± 4.0%                       | 45.6 ± 3.8%                     |           |
| Exp 6 | 4-syllable sentences                                      | shuffled sentences | unpredictable Markovian sentences | predictable Markovian sentences |           |
|       | 37.9 ± 4.3%                                               | 17.3 ± 4.0%        | 22.3 ± 6.0%                       | 6.5 ± 3.4%                      |           |
